# Supplementary material for: Aggregation kinetics and cluster structure of amino-PEG covered gold nanoparticles
Source: Royal Society of Chemistry journal article supplement (doi:10.1039/c6ra03902b), 2016-01-01
Supplement: c6ra03902b1.pdf [file c6ra03902b1.pdf]

## Supporting information

# Aggregation kinetics and cluster structure of amino-PEG covered gold nanoparticles

*Dániel Zámbo<sup>1</sup>, Szilárd Pothorszky<sup>1</sup>, Dermot F. Brougham<sup>2</sup>, András Deák<sup>1</sup>*

<sup>1</sup>Institute for Technical Physics and Materials Science – Centre for Energy Research  
Hungarian Academy of Sciences, Budapest, Hungary

<sup>2</sup>School of Chemistry, University College Dublin, Belfield, Dublin 4, Ireland

Corresponding author: [deak@mfa.kfki.hu](mailto:deak@mfa.kfki.hu)

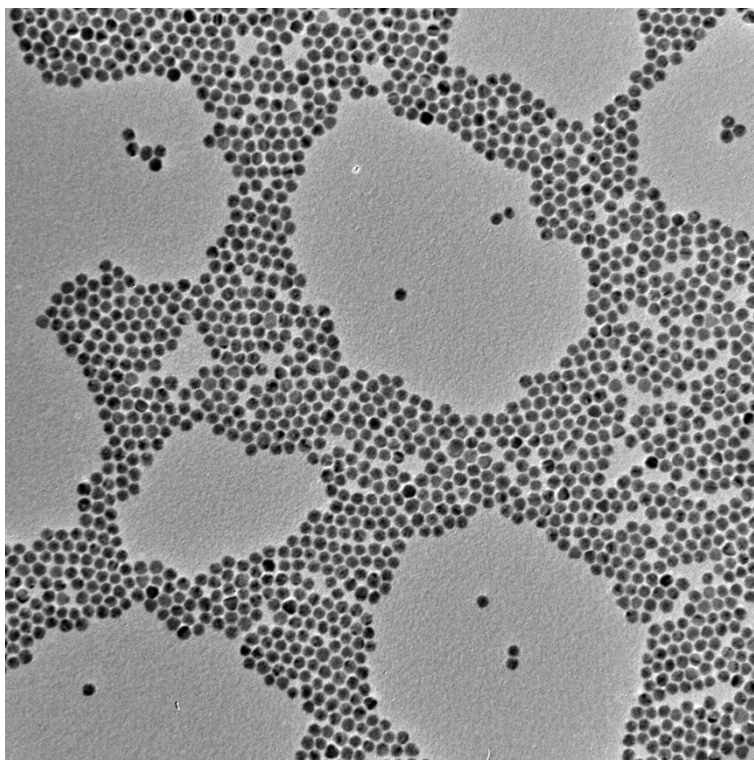

Figure S1. HR-TEM picture of gold nanoparticles

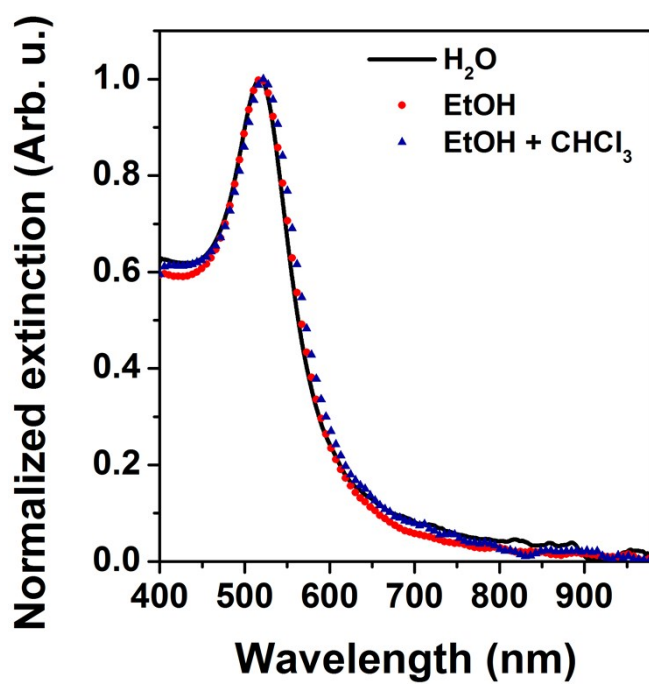

Figure S2. Extinction spectra of aminoPEGylated particles in different solvents, indicating stable transfer into organic medium.

## Effect of high ionic strength on the stability of the particles at room temperature

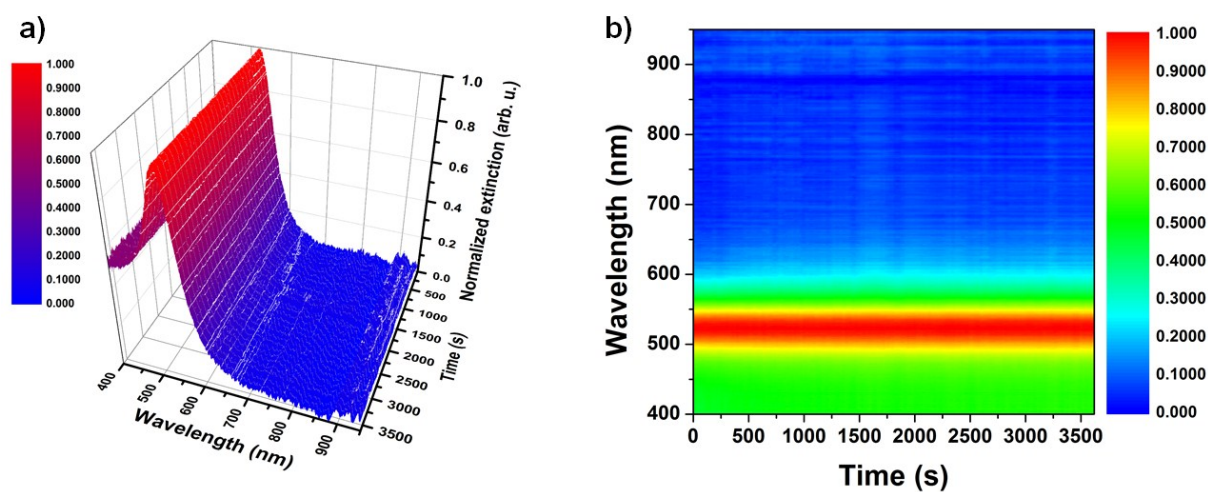

Figure S3. Extinction spectra of aminoPEGylated gold nanoparticles as a function of time at 0.3 M  $K_2SO_4$  concentration and room temperature: a) 3D and b) contour plot representation (colour bars represent the normalized extinction). The absence of any spectral shift or new appearing plasmon bands indicate that the applied salt concentration and temperature has no effect on the stability of the system.
